# Supplementary material for: Phylogenomic analysis of proteins that are distinctive of Archaea and its main subgroups and the origin of methanogenesis
Source: Springer Nature journal article supplement (doi:10.1186/1471-2164-8-86), 2007-01-01
Supplement: Additional file 1 [file 1471-2164-8-86-s1.pdf]

## Additional File 1: Proteins specific to Sulfolobales

| (a) Proteins specific to all 3 <i>Sulfolobus</i> species |                                  |                                   |                                   |
|----------------------------------------------------------|----------------------------------|-----------------------------------|-----------------------------------|
| Saci_0014 [YP_254737]                                    | Saci_0555 [YP_255243]            | Saci_1215 [YP_255854]             | Saci_1748 [YP_256347]             |
| Saci_0022 [YP_254745]                                    | Saci_0661 [YP_255338] rpoG       | Saci_1228 [YP_255867]             | Saci_1752 [YP_256351] COG5592     |
| Saci_0028 [YP_254751]                                    | Saci_0702 [YP_255375]            | Saci_1229 [YP_255868]             | Saci_1754 [YP_256353]             |
| Saci_0045 [YP_254768]                                    | Saci_0716 [YP_255388] CDD43579   | Saci_1243 [YP_255882]             | Saci_1808 [YP_256407]             |
| Saci_0049 [YP_254772]                                    | Saci_0744 [YP_255413]            | Saci_1251 [YP_255890]             | Saci_1811 [YP_256410]             |
| Saci_0090 [YP_254810]                                    | Saci_0746 [YP_255415]            | Saci_1254 [YP_255893]             | Saci_1832 [YP_256431] COG0727     |
| Saci_0098 [YP_254816]*                                   | Saci_0749 [YP_255418]            | Saci_1267 [YP_255904]             | Saci_1840 [YP_256439]             |
| Saci_0099 [YP_254817]*                                   | Saci_0783 [YP_255449]            | Saci_1278 [YP_255913]             | Saci_1845 [YP_256444]             |
| Saci_0109 [YP_254827]                                    | Saci_0816 [YP_255476]            | Saci_1302 [YP_255934]             | Saci_1854 [YP_256453]             |
| Saci_0110 [YP_254828]                                    | Saci_0845 [YP_255505]            | Saci_1325 [YP_255953]             | Saci_1855 [YP_256454] = Saci_0140 |
| Saci_0130 [YP_254846]                                    | Saci_0846 [YP_255506] CDD42003   | Saci_1351 [YP_255979]             | Saci_1856 [YP_256455] = Saci_0140 |
| Saci_0131 [YP_254847]                                    | Saci_0860 [YP_255520]            | Saci_1354 [YP_255982]             | Saci_1859 [YP_256458] cbsB        |
| Saci_0140 [YP_254856] CDD46408                           | Saci_0870 [YP_255529]            | Saci_1378 [YP_256004]             | Saci_1863 [YP_256462]             |
| Saci_0144 [YP_254858]                                    | Saci_0878 [YP_255536]            | Saci_1397 [YP_256020]             | Saci_1886 [YP_256484]             |
| Saci_0146 [YP_254860]                                    | Saci_0879 [YP_255537]            | Saci_1398 [YP_256021]             | Saci_1895 [YP_256491]             |
| Saci_0150 [YP_254864]                                    | Saci_0881 [YP_255539]            | Saci_1402 [YP_256025]             | Saci_1912 [YP_256508]             |
| Saci_0154 [YP_254868]                                    | Saci_0895 [YP_255551]            | Saci_1432 [YP_256054]             | Saci_1917 [YP_256513]             |
| Saci_0165 [YP_254878]                                    | Saci_0898 [YP_255554]            | Saci_1492 [YP_256106]             | Saci_1933 [YP_256529]             |
| Saci_0178 [YP_254890]                                    | Saci_0912 [YP_255568]            | Saci_1493 [YP_256107]             | Saci_1988 [YP_256583]             |
| Saci_0210 [YP_254922]                                    | Saci_0913 [YP_255569]            | Saci_1496 [YP_256110]             | Saci_1992 [YP_256587] CDD28974    |
| Saci_0215 [YP_254927]                                    | Saci_0935 [YP_255590]            | Saci_1504 [YP_256118]             | Saci_2021 [YP_256610]             |
| Saci_0218 [YP_254930]                                    | Saci_0936 [YP_255591]            | Saci_1506 [YP_256120] CDD30949    | Saci_2044 [YP_256633]             |
| Saci_0220 [YP_254932]                                    | Saci_0937 [YP_255592]            | Saci_1551 [YP_256157]             | Saci_2048 [YP_256637] CDD43706    |
| Saci_0232 [YP_254944]                                    | Saci_0951 [YP_255606]            | Saci_1573 [YP_256179]             | Saci_2052 [YP_256639]             |
| Saci_0255 [YP_254965]                                    | Saci_0967 [YP_255622]            | Saci_1590 [YP_256196]             | Saci_2065 [YP_256652]             |
| Saci_0274 [YP_254983] COG1468                            | Saci_0969 [YP_255624]            | Saci_1591 [YP_256197]             | Saci_2072 [YP_256659] = Saci_1676 |
| Saci_0285 [YP_254994]                                    | Saci_0970 [YP_255625]            | Saci_1602 [YP_256208]             | Saci_2082 [YP_256669] = Saci_0140 |
| Saci_0287 [YP_254996]                                    | Saci_0974 [YP_255628]            | Saci_1615 [YP_256220]             | Saci_2091 [YP_256678]             |
| Saci_0298 [YP_255007]                                    | Saci_0984 [YP_255638]            | Saci_1627 [YP_256232]             | Saci_2092 [YP_256679]             |
| Saci_0304 [YP_255013]                                    | Saci_0987 [YP_255641]            | Saci_1634 [YP_256238]             | Saci_2099 [YP_256686] = Saci_0360 |
| Saci_0319 [YP_255028]                                    | Saci_0989 [YP_255643]            | Saci_1649 [YP_256252] COG5440     | Saci_2103 [YP_256690]             |
| Saci_0327 <sup>1</sup> [YP_255036]                       | Saci_0990 [YP_255644]            | Saci_1655 [YP_256258]             | Saci_2107 [YP_256694] COG1011     |
| Saci_0339 [YP_255048]                                    | Saci_0996 [YP_255649]            | Saci_1659 [YP_256262]             | Saci_2108 [YP_256695]             |
| Saci_0341 [YP_255050]                                    | Saci_1012 [YP_255662]            | Saci_1660 [YP_256263]             | Saci_2158 [YP_256742]             |
| Saci_0347 [YP_255056]                                    | Saci_1029 [YP_255679]            | Saci_1668 [YP_256271]             | Saci_2194 [YP_256773]             |
| Saci_0348 [YP_255057] CDD40783                           | Saci_1060 [YP_255710] =Saci_0140 | Saci_1671 [YP_256274] = Saci_1185 | Saci_2237 [YP_256816]             |
| Saci_0352 [YP_255061]                                    | Saci_1063 [YP_255713]            | Saci_1673 [YP_256276]             | Saci_2238 [YP_256817]             |
| Saci_0354 [YP_255063]                                    | Saci_1067 [YP_255717]            | Saci_1676 [YP_256279]             | Saci_2256 [YP_256835]             |
| Saci_0360 [YP_255069]                                    | Saci_1094 [YP_255741]            | Saci_1678 [YP_256281] = Saci_1676 | Saci_2257 [YP_256836]             |
| Saci_0365 [YP_255074]                                    | Saci_1159 [YP_255799]            | Saci_1682 [YP_256285]             | Saci_2258 [YP_256837]             |
| Saci_0376 [YP_255085]                                    | Saci_1171 [YP_255811]            | Saci_1683 [YP_256286]             | Saci_2264 [YP_256843] = Saci_2256 |
| Saci_0426 [YP_255132]                                    | Saci_1175 [YP_255815] flagellar  | Saci_1686 [YP_256287]             | Saci_2279 [YP_256858]             |
| Saci_0431 [YP_255136]                                    | Saci_1177 [YP_255817]            | Saci_1687 [YP_256288]             | Saci_2309 [YP_256888]             |
| Saci_0436 [YP_255141]                                    | Saci_1185 [YP_255825]            | Saci_1689 [YP_256290]             | Saci_2316 [YP_256894]             |
| Saci_0439 [YP_255144]                                    | Saci_1205 [YP_255844]            | Saci_1737 [YP_256336] = Saci_1668 | Saci_2349 [YP_256924] COG1331     |
| Saci_0510 [YP_255209]                                    | Saci_1206 [YP_255845]            | Saci_1746 [YP_256345]             | Saci_2368 [YP_256940]             |
| (b) Proteins present in only 2 <i>Sulfolobus</i> species |                                  |                                   |                                   |
| Saci_0002 [YP_254725]                                    | Saci_0943 [YP_255598]            | Saci_1415 [YP_256038]             | Saci_1945 [YP_256541]             |
| Saci_0021 [YP_254744]                                    | Saci_0988 [YP_255642]            | Saci_1433 [YP_256055]             | Saci_1946 [YP_256542]             |
| Saci_0116 [YP_254833]                                    | Saci_1039 [YP_255689]            | Saci_1434 [YP_256056]             | Saci_1964 [YP_256560]             |
| Saci_0132 [YP_254848]                                    | Saci_1046 [YP_255696]            | Saci_1435 [YP_256057]             | Saci_1994 [YP_256589] = Saci_1945 |
| Saci_0164 [YP_254877] CDD28974                           | Saci_1047 [YP_255697]            | Saci_1446 [YP_256063]             | Saci_2004 [YP_256596]             |
| Saci_0167 [YP_254880]                                    | Saci_1053 [YP_255703]            | Saci_1452 [YP_256067]             | Saci_2005 [YP_256597]             |
| Saci_0172 [YP_254884]                                    | Saci_1076 [YP_255726]            | Saci_1527 [YP_256138]             | Saci_2006 [YP_256598]             |
| Saci_0284 [YP_254993]                                    | Saci_1093 [YP_255740]            | Saci_1631 [YP_256235]             | Saci_2007 [YP_256599]             |
| Saci_0314 [YP_255023]                                    | Saci_1179 [YP_255819]            | Saci_1692 [YP_256293]             | Saci_2027 [YP_256616]             |
| Saci_0460 [YP_255163] COG2129                            | Saci_1186 [YP_255826] MarR       | Saci_1716 [YP_256315]             | Saci_2038 [YP_256627]             |
| Saci_0478 [YP_255177]                                    | Saci_1225 [YP_255864]            | Saci_1761 [YP_256360]             | Saci_2086 [YP_256673] soxC        |
| Saci_0485 [YP_255184]                                    | Saci_1226 [YP_255865]            | Saci_1766 [YP_256365]             | Saci_2093 [YP_256680]             |
| Saci_0495 [YP_255194]                                    | Saci_1235 [YP_255874]            | Saci_1776 [YP_256375]             | Saci_2115 [YP_256702]             |
| Saci_0499 [YP_255198]                                    | Saci_1271 [YP_255907]            | Saci_1791 [YP_256390]             | Saci_2171 [YP_256754]             |
| Saci_0668 [YP_255345]                                    | Saci_1272 [YP_255908]            | Saci_1815 [YP_256414]             | Saci_2180 [YP_256759]             |
| Saci_0679 [YP_255354]                                    | Saci_1305 [YP_255936]            | Saci_1833 [YP_256432]             | Saci_2197 [YP_256776]             |
| Saci_0680 [YP_255355]                                    | Saci_1327 [YP_255955]            | Saci_1898 [YP_256494]             | Saci_2199 [YP_256778]             |
| Saci_0733 [YP_255404]                                    | Saci_1340 [YP_255968]            | Saci_1928 [YP_256524]             | Saci_2311 [YP_256890]             |
| Saci_0794 [YP_255457]                                    | Saci_1366 [YP_255993]            | Saci_1929 [YP_256525]             | Saci_2324 [YP_256902]             |
| Saci_0938 [YP_255593]                                    | Saci_1376 [YP_256002]            | Saci_1932 [YP_256528]             | Saci_2367 [YP_256939]             |

**Note**<sup>1</sup>. A low-scoring homolog to Saci\_0327 is also found in *Aquifex aeolicus* VF5.
