# Supplementary material for: Phylogenomic analysis of proteins that are distinctive of Archaea and its main subgroups and the origin of methanogenesis
Source: Springer Nature journal article supplement (doi:10.1186/1471-2164-8-86), 2007-01-01
Supplement: Additional file 10 [file 1471-2164-8-86-s10.pdf]

**Additional file 10: List of proteins used in phylogenetic analysis**

| Othologous Group | Average Length (aa) | Annotation                                       |
|------------------|---------------------|--------------------------------------------------|
| COG0012          | 397                 | GTP-binding protein, probable translation factor |
| COG0016          | 474                 | phenylalanyl-tRNA synthetase                     |
| COG0018          | 549                 | Arginyl-tRNA synthetase                          |
| COG0048          | 144                 | 30S ribosomal protein S12                        |
| COG0049          | 193                 | 30S ribosomal protein S7                         |
| COG0052          | 197                 | 30S ribosomal protein S2                         |
| COG0060          | 1049                | Isoleucyl-tRNA synthetase                        |
| COG0080          | 158                 | 50S ribosomal protein L11                        |
| COG0081          | 215                 | 50S ribosomal protein L1                         |
| COG0085          | 610                 | DNA-directed RNA polymerase subunit beta         |
| COG0087          | 321                 | 50S ribosomal protein L3                         |
| COG0091          | 155                 | 50S ribosomal protein L22                        |
| COG0092          | 229                 | 30S ribosomal protein S3                         |
| COG0093          | 132                 | 50S ribosomal protein L14                        |
| COG0094          | 178                 | 50S ribosomal protein L5                         |
| COG0096          | 131                 | 30S ribosomal protein S8                         |
| COG0097          | 196                 | 50S ribosomal protein L6                         |
| COG0098          | 198                 | 30S ribosomal protein S5                         |
| COG0099          | 146                 | 30S ribosomal protein S13                        |
| COG0100          | 133                 | 30S ribosomal protein S11                        |
| COG0102          | 156                 | 50S ribosomal protein L13P                       |
| COG0103          | 135                 | 30S ribosomal protein S9                         |
| COG0184          | 152                 | 30S ribosomal protein S15                        |
| COG0186          | 111                 | 30S ribosomal protein S17                        |
| COG0197          | 174                 | 50S ribosomal protein L10/L16                    |
| COG0200          | 154                 | 50S ribosomal protein L15                        |
| COG0201          | 476                 | Preprotein translocase subunit SecY              |
| COG0202          | 907                 | DNA-directed RNA polymerase subunit alpha        |
| COG0256          | 189                 | 50S ribosomal protein L18                        |
| COG0522          | 172                 | 30S ribosomal protein S4                         |
| COG0533          | 540                 | O-sialoglycoprotein endopeptidase                |
